# Supplementary material for: Elucidating the Interaction between Pyridoxine 5′-Phosphate Oxidase and Dopa Decarboxylase: Activation of B6-Dependent Enzyme
Source: MDPI journal article supplement (doi:10.3390/ijms24010642), 2022-12-30
Supplement: s1 [file s1]

## SUPPORTING INFORMATION

# Elucidating the Interaction between Pyridoxine 5'-Phosphate Oxidase and Dopa Decarboxylase: Activation of B6-Dependent Enzyme

Mohammed H. AL Mughram, Mohini S. Ghatge, Glen E. Kellogg and Martin K. Safo \*

Department of Medicinal Chemistry and the Institute for Structural Biology, Drug Discovery, and Development, School of Pharmacy, Virginia Commonwealth University, Richmond, VA 23298, USA

\* Correspondence: msaf@vcu.edu

### This Document:

**Table S1.** Cluspro2.0 docking results for the top 10 clusters of PNPO and apoDDC (PDB 3RCH) complex, along with calculated HINT scores.

**Table S2.** Cluspro2.0 docking results for the top 10 clusters of PNPO and apoDDC-AF (model) complex, along with calculated HINT scores.

**Table S3.** Cluspro2.0 docking results for the top 10 clusters of PNPO and holoDDC complex (PDB 1JS3), along with calculated HINT scores.

**Table S4.** Cluspro2.0 docking results for the top 10 clusters of PNPO and holoDDC (model) complex, along with calculated HINT scores.

**Table S5.** Key interactions at the domain interface for the PNPO•apoDDC complex model as predicted by MD simulations.

**Table S6.** Key interactions at the domain interface for the PNPO•holoDDC complex model as predicted by MD simulations.

**Table S7.** *In silico* alanine scanning of the PNPO•apoDDC-AF complex obtained by hierarchical clustering of MD trajectories.

**Figure S1.** SPR results for the binding of PNPO to immobilized holoDDC and holoSHMT.

**Table S1.** Cluspro2.0 docking results for the top 10 clusters of PNPO and apoDDC (PDB: 3RCH) complex, along with calculated HINT scores.

| Cluster | Members | %   | HINT score | Hydrogen Bond | Acid/Base | Hydrophobic | Acid/Acid | Base/Base | Hydroph./Polar |
|---------|---------|-----|------------|---------------|-----------|-------------|-----------|-----------|----------------|
| 0       | 76      | 7.6 | 2032.209   | 8596.166      | 3226.822  | 2706.76     | -789.2139 | -3385.264 | -8323.062      |
| 1       | 71      | 7.1 | 1152.42    | 9578.741      | 2970.288  | 2839.457    | -645.8171 | -4312.954 | -9277.295      |
| 2       | 43      | 4.3 | 6336.489   | 13193.75      | 3990.281  | 2181.616    | -904.4463 | -4329.23  | -7795.483      |
| 3       | 37      | 3.7 | 2868.208   | 6721.397      | 1398.719  | 2037.818    | -134.4676 | -1730.892 | -5424.368      |
| 4       | 36      | 3.6 | 7867.385   | 17079.55      | 4806.177  | 2496.075    | -1252.961 | -5930.431 | -9331.025      |
| 5       | 35      | 3.5 | 7337.191   | 15509.96      | 3977.718  | 3029.297    | -1070.994 | -4849.986 | -9258.809      |
| 6       | 32      | 3.2 | 3616.5     | 10424.32      | 2387.766  | 1955.174    | -723.9514 | -3269.073 | -7157.736      |
| 7       | 32      | 3.2 | 4732.194   | 13330.25      | 4406.887  | 2810.313    | -815.2784 | -6449.8   | -8550.173      |
| 8       | 29      | 2.9 | 5496.712   | 16148.84      | 4427.738  | 3060.189    | -1024.375 | -5939.218 | -11176.46      |
| 9       | 26      | 2.6 | -339.0726  | 7988.533      | 2497.652  | 2166.552    | -623.7452 | -4173.083 | -8194.98       |

**Table S2.** Cluspro2.0 docking results for the top 10 clusters of PNPO and apoDDC-AF (model) complex, along with calculated HINT scores.

| Cluster | Members | %   | HINT score | Hydrogen Bond | Acid/Base | Hydrophobic | Acid/Acid | Base/Base | Hydroph./Polar |
|---------|---------|-----|------------|---------------|-----------|-------------|-----------|-----------|----------------|
| 0       | 52      | 5.2 | 8649.985   | 13017.68      | 1870.801  | 1606.691    | -733.7706 | -2387.735 | -4723.683      |
| 1       | 45      | 4.5 | 1789.329   | 10401.7       | 3242.745  | 2781.445    | -505.138  | -4667.735 | -9463.684      |
| 2       | 44      | 4.4 | 549.0074   | 4843.478      | 2555.973  | 2012.546    | -557.3123 | -2878.877 | -5426.8        |
| 3       | 43      | 4.3 | 3389.987   | 9625.224      | 2650.935  | 2134.361    | -565.8962 | -4081.872 | -6372.764      |
| 4       | 40      | 4   | 745.7246   | 5119.332      | 1937.121  | 2381.634    | -291.5302 | -3445.69  | -4955.142      |
| 5       | 36      | 3.6 | 2669.604   | 9728.706      | 2697.509  | 2230.926    | -206.4271 | -5673.592 | -6107.517      |
| 6       | 34      | 3.4 | 668.2127   | 3655.788      | 1401.505  | 1523.839    | -217.4465 | -1175.301 | -4520.171      |
| 7       | 30      | 3   | 5486.292   | 13080.61      | 3581.48   | 2238.726    | -556.8046 | -4326.55  | -8531.171      |
| 8       | 29      | 2.9 | 2146.309   | 6029.135      | 1373.44   | 1534.223    | -240.0219 | -1718.776 | -4831.691      |
| 9       | 29      | 2.9 | 348.5145   | 8042.262      | 2605.485  | 2045.279    | -559.587  | -4772.616 | -7012.308      |

**Table S3.** Cluspro2.0 docking results for the top 10 clusters of PNPO and holoDDC complex (PDB 1JS3), along with calculated HINT scores.

| Cluster | Members | %   | HINT score | Hydrogen Bond | Acid/Base | Hydrophobic | Acid/Acid | Base/Base | Hydroph./Polar |
|---------|---------|-----|------------|---------------|-----------|-------------|-----------|-----------|----------------|
| 0       | 58      | 5.8 | 2222.017   | 5653.545      | 1865.784  | 1384.034    | -698.7088 | -1508.832 | -4473.805      |
| 1       | 55      | 5.5 | 2401.835   | 5388.355      | 2648.495  | 1539.826    | -533.5378 | -2249.115 | -4392.188      |
| 2       | 52      | 5.2 | 2085.665   | 5640.911      | 2166.836  | 1396.976    | -759.2861 | -2337.534 | -4022.238      |
| 3       | 47      | 4.7 | 11061.66   | 21090.79      | 4964.848  | 1864.776    | -1026.855 | -6830.125 | -9001.772      |
| 4       | 45      | 4.5 | 859.9533   | 4174.195      | 2288.513  | 1464.489    | -802.5218 | -2194.99  | -4069.731      |
| 5       | 44      | 4.4 | 11544.62   | 19866.46      | 4463.452  | 1803.829    | -778.8778 | -5986.074 | -7824.172      |
| 6       | 44      | 4.4 | 13924.61   | 24358.32      | 5873.867  | 1794.173    | -1151.033 | -7894.123 | -9056.592      |
| 7       | 33      | 3.3 | 9606.528   | 18262.32      | 5231.149  | 1945.587    | -838.3188 | -6069.647 | -8924.565      |
| 8       | 29      | 2.9 | -2173.584  | 5026.435      | 2564.959  | 1957.44     | -817.2881 | -3772.891 | -7132.24       |
| 9       | 26      | 2.6 | 3512.605   | 11744.63      | 3275.028  | 1964.022    | -1030.814 | -4382.392 | -8057.873      |

**Table S4.** Cluspro2.0 docking results for the top 10 clusters of PNPO and holoDDC (model) complex, along with calculated HINT scores.

| Cluster | Members | %   | HINT score | Hydrogen Bond | Acid/Base | Hydrophobic | Acid/Acid | Base/Base | Hydroph./Polar |
|---------|---------|-----|------------|---------------|-----------|-------------|-----------|-----------|----------------|
| 0       | 78      | 7.8 | 4745.655   | 11350.68      | 3113.448  | 2308.501    | -660.892  | -4317.154 | -7048.932      |
| 1       | 74      | 7.4 | 4755.787   | 11107.45      | 3106.383  | 2093.718    | -882.9797 | -3577.388 | -7091.4        |
| 2       | 32      | 3.2 | 181.1883   | 4154.712      | 1557.112  | 1461.816    | -168.1234 | -2036.553 | -4787.775      |
| 3       | 30      | 3   | 8928.14    | 14843.65      | 3738.476  | 1728.813    | -807.2473 | -3650.755 | -6924.799      |
| 4       | 30      | 3   | 7503.392   | 14103.93      | 3613.991  | 1741.297    | -585.3145 | -4067.964 | -7302.544      |
| 5       | 28      | 2.8 | 5248.711   | 10989.66      | 2477.844  | 1664.984    | -412.624  | -4168.736 | -5302.421      |
| 6       | 26      | 2.6 | 3973.426   | 9907.376      | 2247.175  | 1939.506    | -331.0345 | -3082.377 | -6707.22       |
| 7       | 23      | 2.3 | 4787.83    | 10147.88      | 2238.768  | 1874.134    | -267.4978 | -3531.957 | -5673.502      |
| 8       | 19      | 1.9 | 3520.338   | 8087.063      | 2091.333  | 1954.558    | -432.3741 | -3062.331 | -5117.911      |
| 9       | 19      | 1.9 | 2944.349   | 7515.712      | 2115.851  | 1722.862    | -265.2529 | -2371.483 | -5773.34       |

**Table S5.** Key interactions at the domain interface for the PNPO•apoDDC complex model as predicted by MD simulations.

| Donor     | Acceptor  | Occupancy |             |
|-----------|-----------|-----------|-------------|
| ARG88-sc  | GLU421-sc | 69.30%    | DDC chainA  |
| ARG88-sc  | ASP442-sc | 67.93%    | DDC chainB  |
| GLU114-sc | LYS207-sc | 53.60%    | PNPO chainA |
| TYR183-sc | GLU181-sc | 47.62%    | PNPO chainB |
| HIS439-sc | ARG88-sc  | 41.23%    |             |
| TYR332-sc | GLN214-sc | 36.13%    |             |
| ARG197-sc | THR238-bb | 36.10%    |             |
| GLU181-sc | LYS187-sc | 27.66%    |             |
| ARG228-sc | GLU114-sc | 20.30%    |             |
| GLU480-sc | LYS119-sc | 14.61%    |             |
| GLU227-sc | LYS204-sc | 13.70%    |             |

**Table S6.** Key interactions at the domain interface for the PNPO•holoDDC complex model as predicted by MD simulations.

| Donor     | Acceptor  | Occupancy |             |
|-----------|-----------|-----------|-------------|
| THR246-sc | ASP240-sc | 66.14%    | DDC chainA  |
| SER193-sc | ASP240-sc | 59.64%    | DDC chainB  |
| THR238-sc | SER104-sc | 58.89%    | PNPO chainA |
| LYS91-sc  | GLU425-sc | 43.82%    | PNPO chainB |
| SER193-bb | ASP240-sc | 35.91%    |             |
| THR54-sc  | TYR332-bb | 35.48%    |             |
| ARG258-sc | ASP228-sc | 35.35%    |             |
| ARG426-sc | ASP89-sc  | 32.66%    |             |
| TYR332-bb | LEU53-bb  | 28.24%    |             |
| LYS327-sc | GLU251-sc | 26.41%    |             |
| ARG439-sc | GLU257-sc | 17.26%    |             |
| ARG347-sc | ASP253-sc | 13.01%    |             |

**Table S7.** *In silico* alanine scanning of the PNPO•apoDDC-AF complex model obtained by hierarchical clustering of MD trajectories. Binding energy changes ( $\Delta\Delta G = \Delta G_{\text{wild-type}} - \Delta G_{\text{ALA}}$ ) for key interacting amino acid residues at the interface with respect to clusters as predicted by Robetta server, where negative  $\Delta\Delta G$  values (kcal mol<sup>-1</sup>) indicate unfavorable replacement.

| Residue no. | chainID | $\Delta\Delta G$ (kcal/mol) |          |          |          |          |          |          |          | AV     | STDDEV  |
|-------------|---------|-----------------------------|----------|----------|----------|----------|----------|----------|----------|--------|---------|
|             |         | cluster1                    | cluster2 | cluster3 | cluster4 | cluster5 | cluster6 | cluster7 | cluster8 |        |         |
| 103         | DDC_B   | 0.38                        |          | 0.63     | 0.67     | 0.63     |          |          |          | 0.5775 | 0.13301 |
| 176         | DDC_B   | 0.96                        | 1.1      | 0.4      |          | 1.14     | 0.22     |          |          | 0.764  | 0.42459 |
| 326         | DDC_B   |                             | 0.34     |          |          |          | 0.23     | 0.24     |          | 0.27   | 0.06083 |
| 327         | DDC_B   | 0.29                        | 1.6      | 1.47     | 0.28     | 0.22     | 0.3      | 0.38     | 0.66     | 0.65   | 0.56338 |
| 328         | DDC_B   | 0.66                        | 0.99     | 0.83     |          | 0.62     | 0.65     | 0.82     | 0.6      | 0.7386 | 0.14462 |
| 331         | DDC_B   | 0.4                         | 0.49     | 0.31     | 0.21     | 0.46     | 0.3      | 0.13     | 0.36     | 0.3325 | 0.12186 |
| 332         | DDC_B   | 2.42                        | 2.29     | 2.68     | 2.47     | 2.72     | 2.47     | 2.42     | 2.56     | 2.5038 | 0.14292 |
| 333         | DDC_B   | 0.36                        | 0.27     | 0.33     |          |          | 0.27     |          |          | 0.3075 | 0.045   |
| 353         | DDC_B   | 0.61                        |          | 0.69     | 1.27     | 1.2      | 1.06     | 0.92     | 0.83     | 0.94   | 0.24993 |
| 181         | DDC_A   |                             | 0.7      | 1.27     | 0.97     | 0.17     | -0.07    |          |          | 0.608  | 0.55436 |
| 197         | DDC_A   | 3.69                        | 2.95     | 2.32     | 2.66     | 3.37     | 2.8      | 2.29     | 2.95     | 2.8788 | 0.48144 |
| 200         | DDC_A   | 0.95                        | 0.97     | 0.66     | 0.68     | 2.4      | 0.83     | 1.04     | 0.64     | 1.0213 | 0.57791 |
| 201         | DDC_A   | 0.34                        | 0.52     |          |          |          |          | 0.54     |          | 0.4667 | 0.11015 |
| 207         | DDC_A   | 0.51                        | 1.51     | 1.83     | 2.4      |          | 0.98     | 2.65     | 0.77     | 1.5214 | 0.81871 |
| 228         | DDC_A   | 1.14                        | 0.33     |          | 0.96     | 1.08     | 1.18     | 2.11     | 0.31     | 1.0157 | 0.60764 |
| 417         | DDC_A   | 1.03                        | 0.61     | 0.93     | 0.98     | 0.65     | 3        | 1.92     | 0.54     | 1.2075 | 0.84468 |
| 421         | DDC_A   | 0.77                        | 4.15     | 0.59     | 1.47     | 1.05     | 1.45     | 2.7      | 3.14     | 1.915  | 1.27286 |
| 441         | DDC_A   |                             | 0.11     | 0.1      | 0.06     | 0.12     | 0.01     | 0.03     | 0.12     | 0.0786 | 0.04525 |
| 442         | DDC_A   | 0.57                        | -0.48    | 0.66     | 0.6      | 0.99     | 1.3      | 0.58     | 0.41     | 0.5788 | 0.51352 |
| 51          | PNPO_B  | 0.08                        |          | 0.23     |          | 0.36     |          |          |          | 0.2233 | 0.14012 |
| 56          | PNPO_B  |                             | 1.06     | 1.11     |          | 0.43     |          |          |          | 0.8667 | 0.37899 |
| 88          | PNPO_B  | 1.37                        | 4.59     | 1.06     | 1.95     | 1.49     | 1.79     | 3.02     | 3.49     | 2.345  | 1.23077 |
| 119         | PNPO_B  | 0.13                        |          |          | 0.4      |          | 0.67     | 0.51     | 0.05     | 0.352  | 0.25927 |
| 212         | PNPO_B  | 1.09                        | 0.67     | 1.18     |          | 0.96     | 1.05     | 1.06     | 0.78     | 0.97   | 0.18221 |
| 214         | PNPO_B  | 0.21                        | 0.76     | 0.83     | 0.68     | 0.92     | 0.43     | 0.52     | 0.71     | 0.6325 | 0.23249 |
| 234         | PNPO_B  | 0.33                        | 0.39     | 0.38     | 0.41     | 0.51     | 0.34     | 0.39     | 0.47     | 0.4025 | 0.06112 |
| 236         | PNPO_B  | 0.48                        | 0.67     | 0.72     | 0.75     | 0.23     | 0.79     | 0.52     | 0.32     | 0.56   | 0.20743 |
| 238         | PNPO_B  | 0.23                        |          |          | 0.35     | 0.39     |          |          |          | 0.3233 | 0.08327 |
| 240         | PNPO_B  | 0.99                        | 0.52     | -0.21    | -0.14    |          | 0.24     | -0.11    | -0.18    | 0.1586 | 0.45466 |
| 241         | PNPO_B  |                             | 0.96     | -0.01    | -0.03    | -0.08    | -0.05    | -0.05    |          | 0.1233 | 0.41054 |
| 249         | PNPO_B  |                             | 1.34     | 0.72     | -0.11    | 0.15     | 0.91     |          | 0.21     | 0.5367 | 0.54639 |
| 252         | PNPO_B  | -0.07                       |          | -0.08    | 0.28     |          |          | 0.42     |          | 0.1375 | 0.25198 |
| 253         | PNPO_B  | 0.2                         | -0.17    |          | 0.34     | 0.15     | 0.49     | -0.09    | 0.82     | 0.2486 | 0.34036 |
| 88          | PNPO_A  | 1.31                        | 0.33     | 1.34     | 1.18     | 1.74     | 2.12     | 1.53     | 1.57     | 1.39   | 0.51879 |
| 114         | PNPO_A  | 0.98                        | 0.27     | 0.03     | 1.44     | 1.71     | 1.55     | 2.32     | 0.52     | 1.1025 | 0.7895  |
| 119         | PNPO_A  | 0.54                        | 0.08     | 0.24     | 0.69     |          | 0.73     | -0.43    | 0.32     | 0.31   | 0.40398 |
| 183         | PNPO_A  |                             | 0.84     | 0.64     | 1.18     | -0.04    | 0.22     |          |          | 0.568  | 0.48592 |
| 187         | PNPO_A  |                             | -0.15    | 0.45     |          | 0.2      |          |          |          | 0.1667 | 0.30139 |
| 204         | PNPO_A  | 0.95                        | 0.77     | 0        | 0        | 0.57     | 0.13     | 0.16     | 1.02     | 0.45   | 0.42815 |

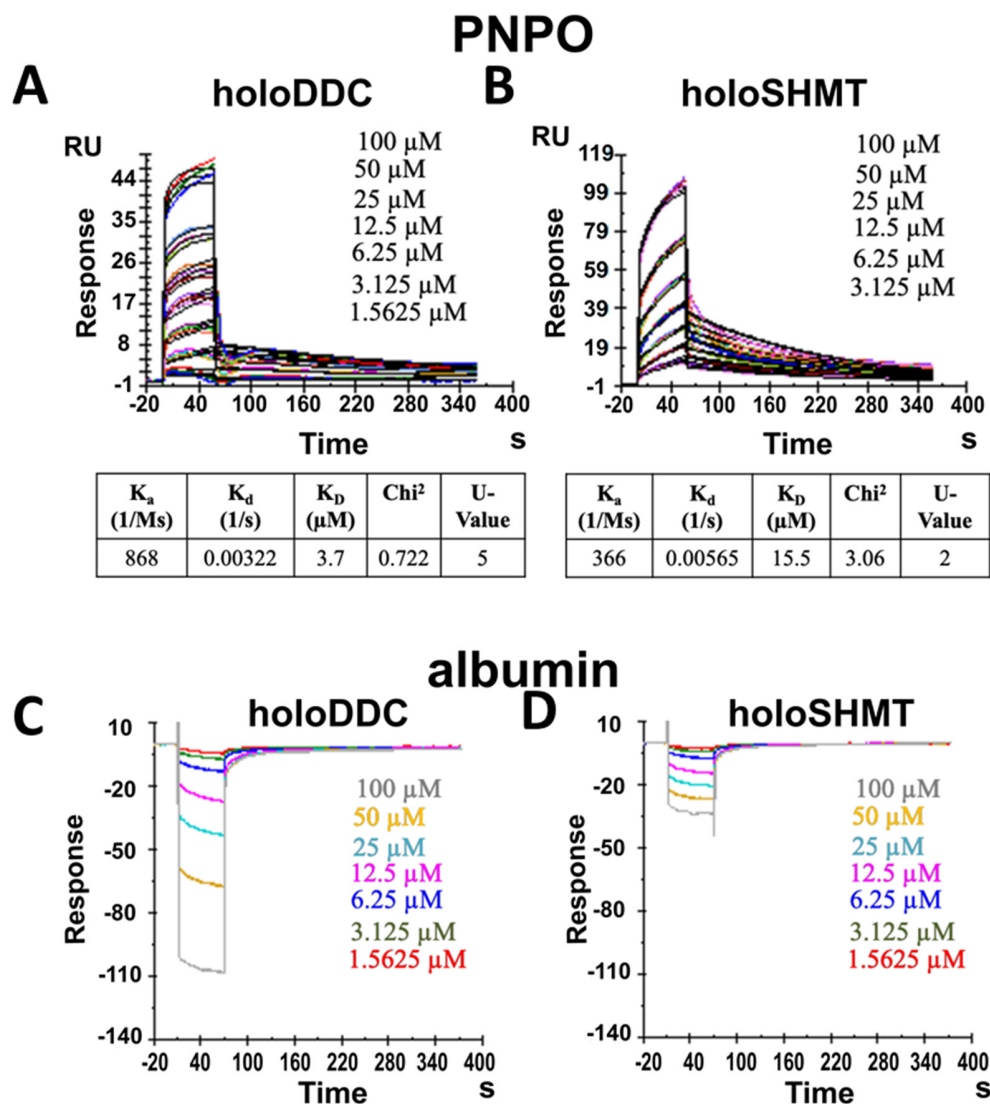

**Figure S1.** SPR results for the binding of PNPO to immobilized holoDDC and holoSHMT. (A) SPR sensorgram binding of PNPO to holoDDC; (B) SPR sensorgram binding of PNPO to holoSHMT (positive control); and (C-D) Negative control, binding of albumin to holoDDC and holoSHMT, respectively. Flow rate of all analytes were maintained at 50  $\mu$ L/min, and injections of 100  $\mu$ M to 1.5625  $\mu$ M (from top to bottom) were made. The contact and dissociation times used for all analytes were 60 s and 300 s, respectively. One 15 s pulse of 1 M NaCl was injected for surface regeneration. All analytes were injected in triplicate.
